# Supplementary material for: Consensus pan-genome assembly of the specialised wine bacterium Oenococcus oeni
Source: PubMed Central journal article supplement (PMC4847254; doi:10.1186/s12864-016-2604-7), 2016-04-27

### Core-genome

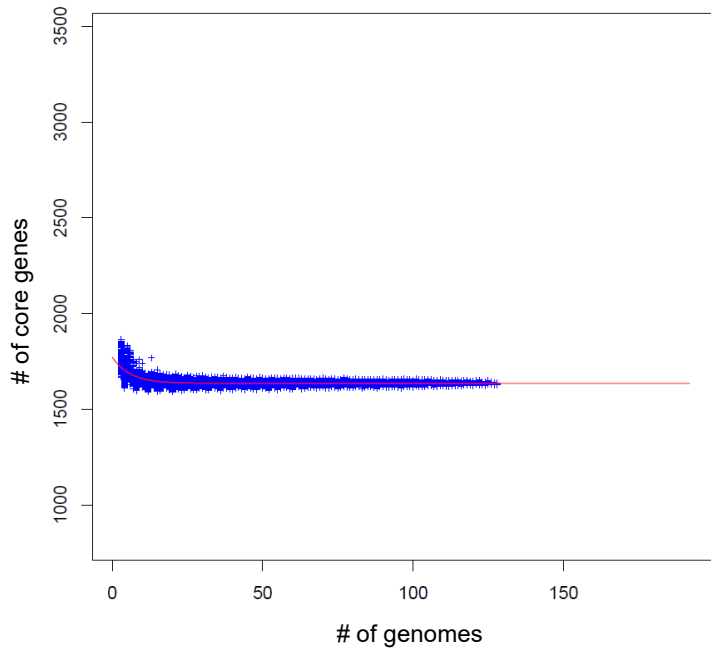

### Pan-genome

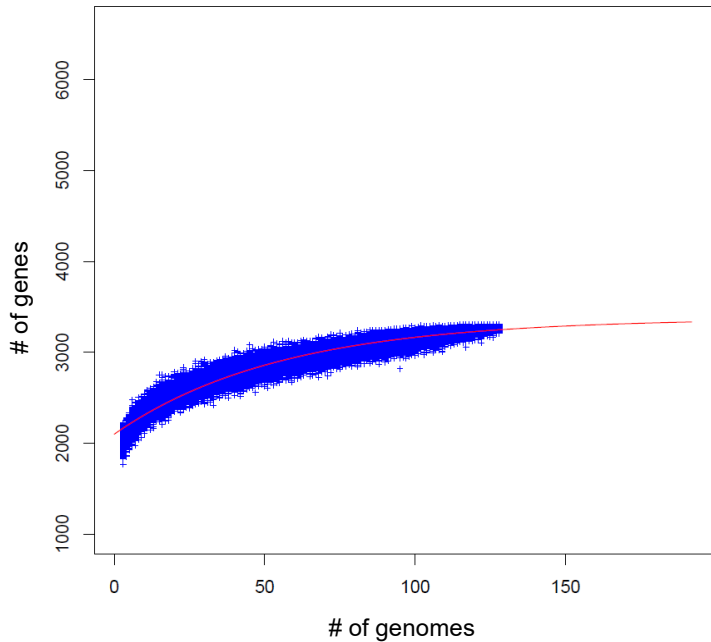

Supplement: 12864_2016_2604_MOESM1_ESM.pdf [file 12864_2016_2604_MOESM1_ESM.pdf]
