# Supplementary material for: Consensus pan-genome assembly of the specialised wine bacterium Oenococcus oeni
Source: PubMed Central journal article supplement (PMC4847254; doi:10.1186/s12864-016-2604-7), 2016-04-27
Supplement: 12864_2016_2604_MOESM2_ESM.pdf [file 12864_2016_2604_MOESM2_ESM.pdf]

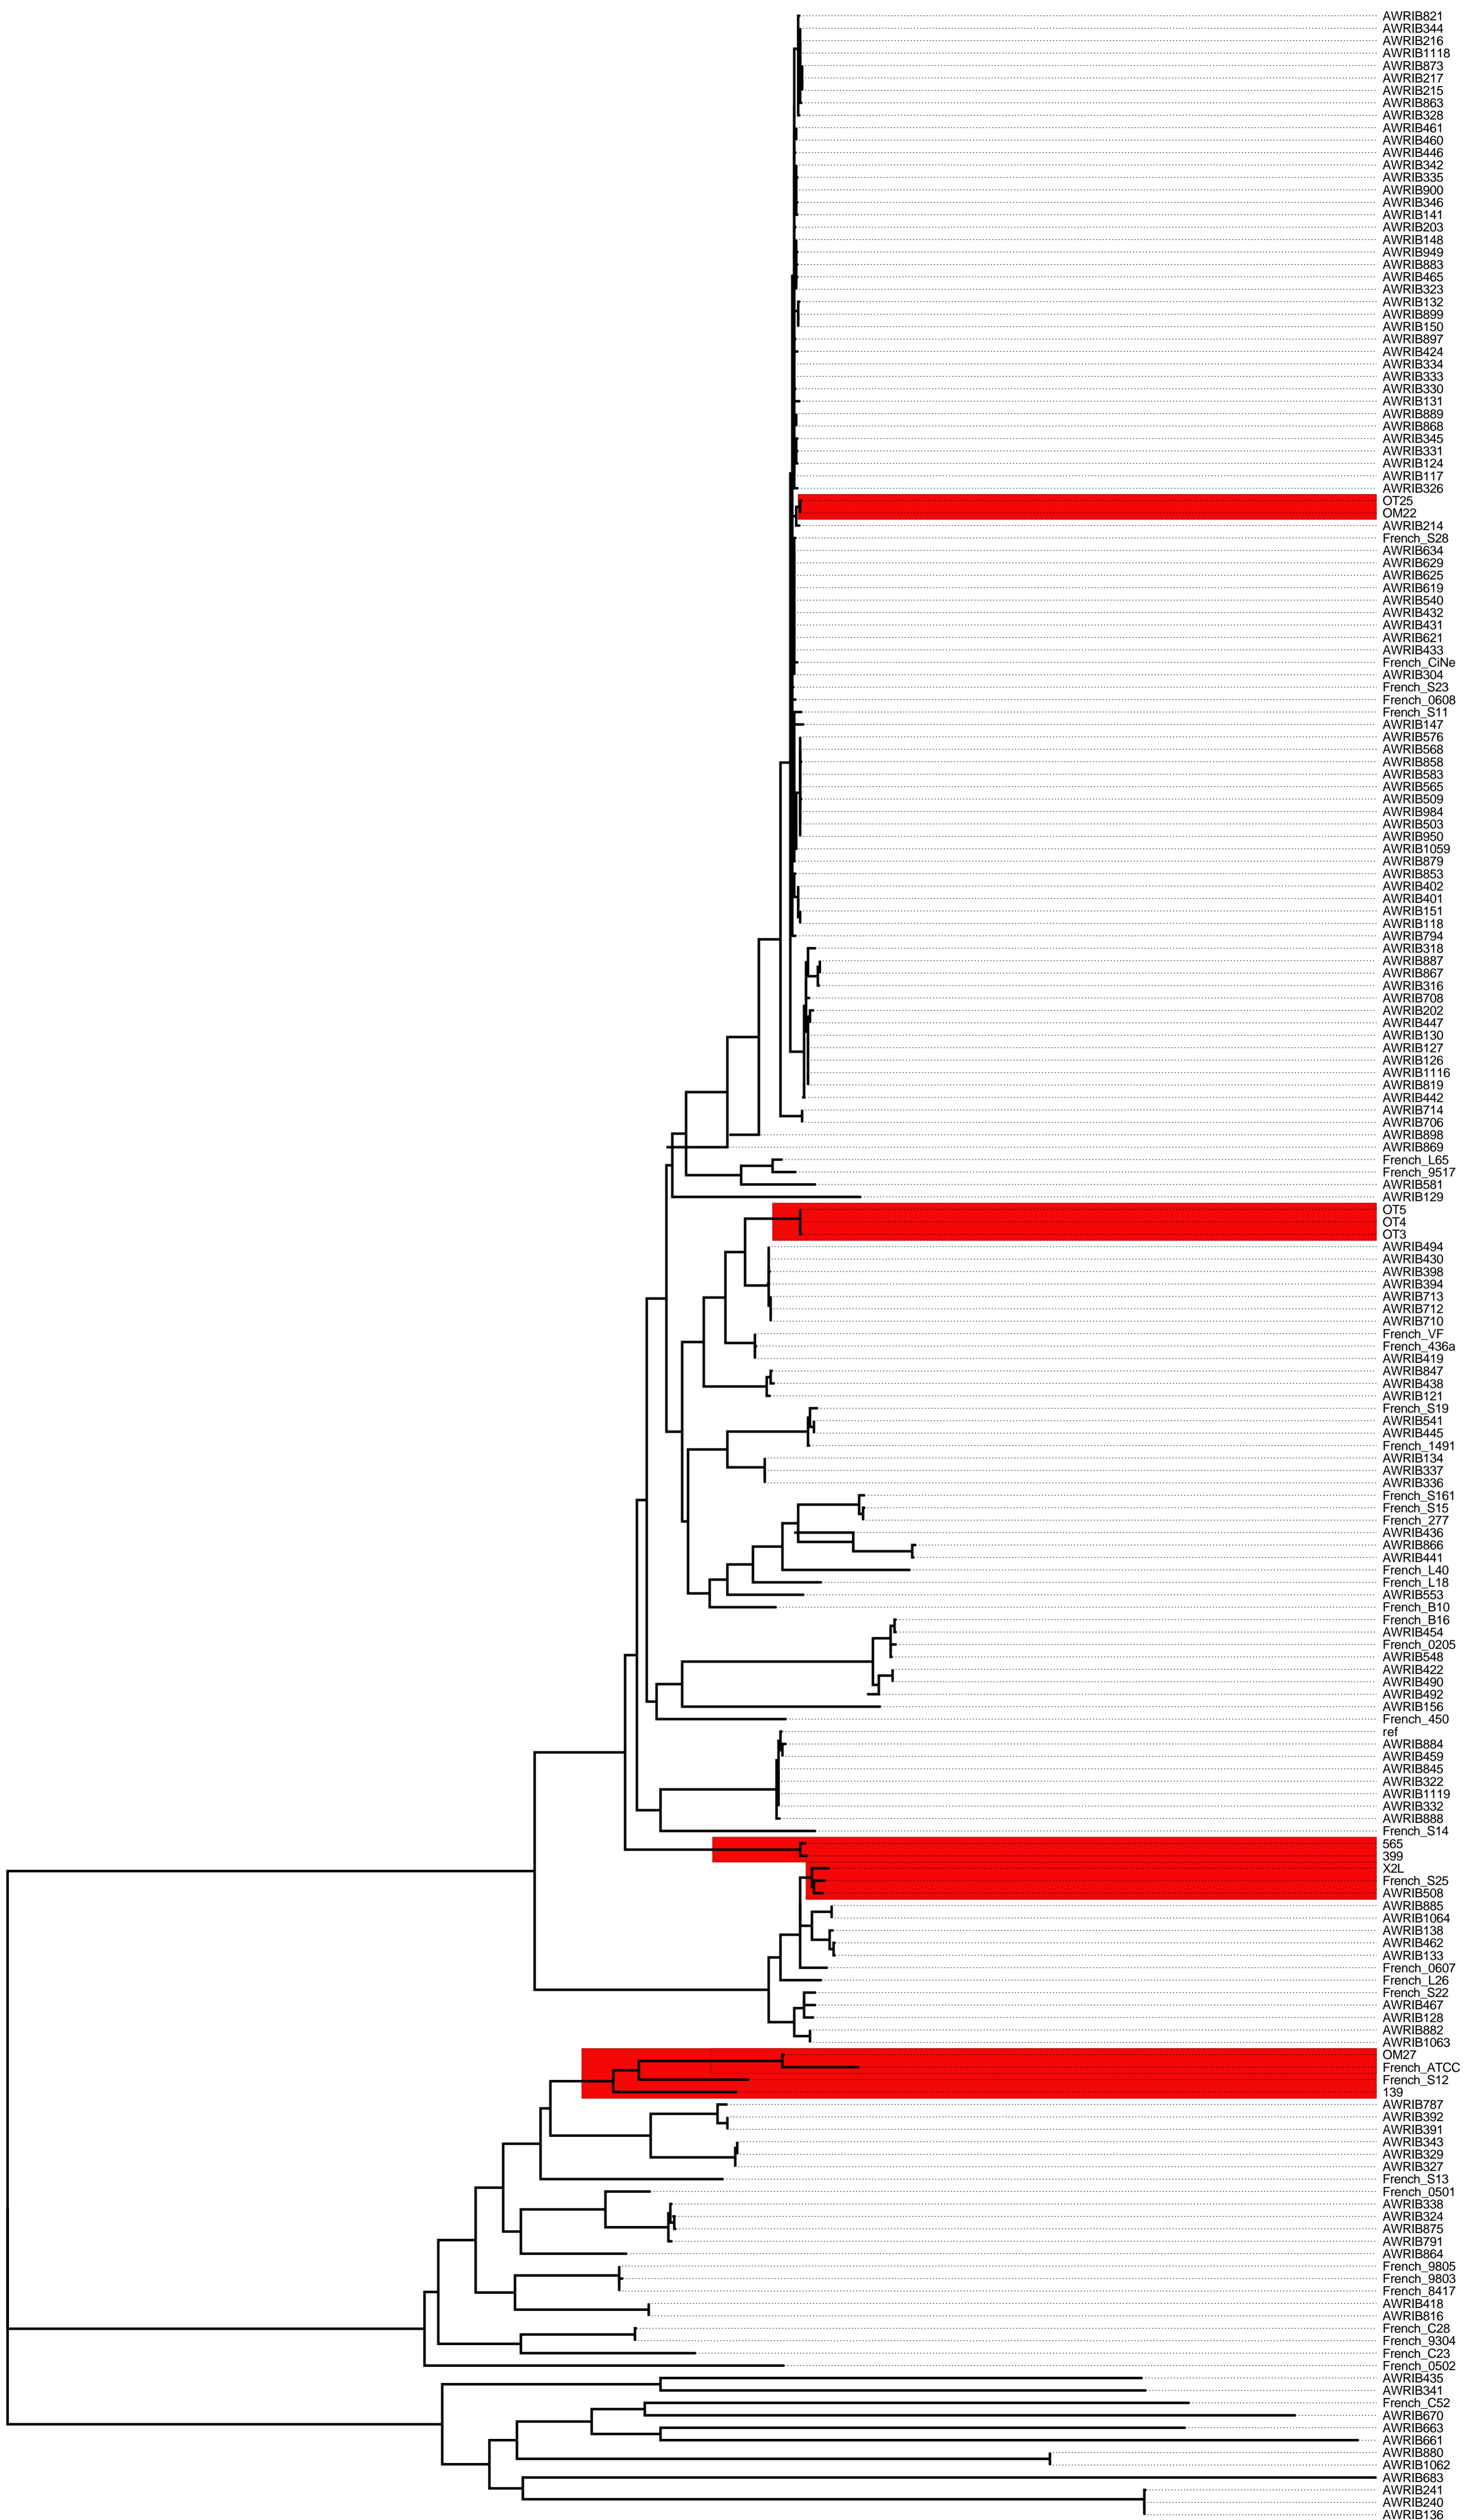

AWRIB821  
 AWRIB344  
 AWRIB216  
 AWRIB1118  
 AWRIB873  
 AWRIB217  
 AWRIB215  
 AWRIB863  
 AWRIB328  
 AWRIB461  
 AWRIB460  
 AWRIB446  
 AWRIB342  
 AWRIB335  
 AWRIB900  
 AWRIB346  
 AWRIB141  
 AWRIB203  
 AWRIB148  
 AWRIB949  
 AWRIB883  
 AWRIB465  
 AWRIB323  
 AWRIB132  
 AWRIB899  
 AWRIB150  
 AWRIB897  
 AWRIB424  
 AWRIB334  
 AWRIB333  
 AWRIB330  
 AWRIB131  
 AWRIB889  
 AWRIB868  
 AWRIB345  
 AWRIB331  
 AWRIB124  
 AWRIB117  
 AWRIB326  
 OT25  
 OM22  
 AWRIB214  
 French\_S28  
 AWRIB634  
 AWRIB629  
 AWRIB625  
 AWRIB619  
 AWRIB540  
 AWRIB432  
 AWRIB431  
 AWRIB621  
 AWRIB433  
 French\_CiNe  
 AWRIB304  
 French\_S23  
 French\_0608  
 French\_S11  
 AWRIB147  
 AWRIB576  
 AWRIB568  
 AWRIB858  
 AWRIB583  
 AWRIB565  
 AWRIB509  
 AWRIB984  
 AWRIB503  
 AWRIB950  
 AWRIB1059  
 AWRIB879  
 AWRIB853  
 AWRIB402  
 AWRIB401  
 AWRIB151  
 AWRIB118  
 AWRIB794  
 AWRIB318  
 AWRIB887  
 AWRIB867  
 AWRIB316  
 AWRIB708  
 AWRIB202  
 AWRIB447  
 AWRIB130  
 AWRIB127  
 AWRIB126  
 AWRIB1116  
 AWRIB819  
 AWRIB442  
 AWRIB714  
 AWRIB706  
 AWRIB898  
 AWRIB869  
 French\_L65  
 French\_9517  
 AWRIB581  
 AWRIB129  
 OT5  
 OT4  
 OT3  
 AWRIB494  
 AWRIB430  
 AWRIB398  
 AWRIB394  
 AWRIB713  
 AWRIB712  
 AWRIB710  
 French\_VF  
 French\_436a  
 AWRIB419  
 AWRIB847  
 AWRIB438  
 AWRIB121  
 French\_S19  
 AWRIB541  
 AWRIB445  
 French\_1491  
 AWRIB134  
 AWRIB337  
 AWRIB336  
 French\_S161  
 French\_S15  
 French\_277  
 AWRIB436  
 AWRIB866  
 AWRIB441  
 French\_L40  
 French\_L18  
 AWRIB553  
 French\_B10  
 French\_B16  
 AWRIB454  
 French\_0205  
 AWRIB548  
 AWRIB422  
 AWRIB490  
 AWRIB492  
 AWRIB156  
 French\_450  
 ref  
 AWRIB884  
 AWRIB459  
 AWRIB845  
 AWRIB322  
 AWRIB1119  
 AWRIB332  
 AWRIB332  
 AWRIB888  
 French\_S14  
 565  
 399  
 X2L  
 French\_S25  
 AWRIB508  
 AWRIB885  
 AWRIB1064  
 AWRIB138  
 AWRIB462  
 AWRIB133  
 French\_0607  
 French\_L26  
 French\_S22  
 AWRIB467  
 AWRIB128  
 AWRIB882  
 AWRIB1063  
 OM27  
 French\_ATCC  
 French\_S12  
 139  
 AWRIB787  
 AWRIB392  
 AWRIB391  
 AWRIB343  
 AWRIB329  
 AWRIB327  
 French\_S13  
 French\_0501  
 AWRIB338  
 AWRIB324  
 AWRIB875  
 AWRIB791  
 AWRIB864  
 French\_9805  
 French\_9803  
 French\_8417  
 AWRIB418  
 AWRIB816  
 French\_C28  
 French\_9304  
 French\_C23  
 French\_0502  
 AWRIB435  
 AWRIB341  
 French\_C52  
 AWRIB670  
 AWRIB663  
 AWRIB661  
 AWRIB880  
 AWRIB1062  
 AWRIB683  
 AWRIB241  
 AWRIB240  
 AWRIB136
