# Supplementary material for: Consensus pan-genome assembly of the specialised wine bacterium Oenococcus oeni
Source: PubMed Central journal article supplement (PMC4847254; doi:10.1186/s12864-016-2604-7), 2016-04-27
Supplement: 12864_2016_2604_MOESM4_ESM.pdf [file 12864_2016_2604_MOESM4_ESM.pdf]

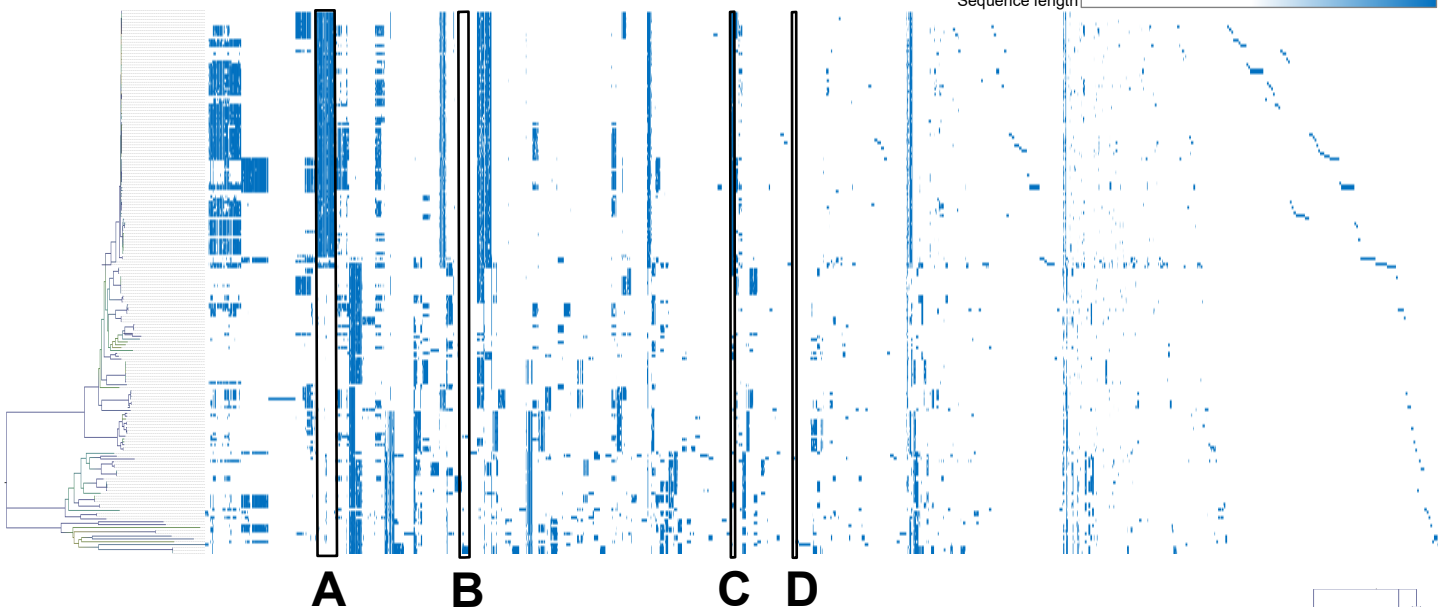

**A**

| Position | IGI # | Cluster # | RAST annotation                                                                                    | BLAST top hit                                                                 |
|----------|-------|-----------|----------------------------------------------------------------------------------------------------|-------------------------------------------------------------------------------|
| 258      | 12    | CL_1839   | Tyrosine-protein kinase transmembrane modulator EpsC                                               | capsular polysaccharide biosynthesis protein [Oenococcus oeni]                |
| 259      | 12    | CL_1838   | capsular polysaccharide biosynthesis protein                                                       | hypothetical protein [Oenococcus oeni]                                        |
| 260      | 12    | CL_1837   | Manganese-dependent protein-tyrosine phosphatase (EC 3.1.3.48)                                     | hypothetical protein [Oenococcus oeni]                                        |
| 261      | 12    | CL_1836   | Undecaprenyl-phosphate galactosephosphotransferase (EC 2.7.8.6)                                    | sugar transferase [Oenococcus oeni]                                           |
| 262      | 12    | CL_1835   | Polysaccharide biosynthesis protein CpsF                                                           | UDP-N-acetylglucosamine:LPS N-acetylglucosamine transferase [Oenococcus oeni] |
| 263      | 12    | CL_1834   | Glycosyl transferase CpsG                                                                          | multidrug MFS transporter [Oenococcus oeni]                                   |
| 264      | 12    | CL_1833   | -                                                                                                  | hypothetical protein AWRIB575_968 [Oenococcus oeni AWRIB576]                  |
| 265      | 12    | CL_1832   | -                                                                                                  | glycosyltransferase [Oenococcus oeni]                                         |
| 266      | 12    | CL_1831   | -                                                                                                  | glycosyltransferase family 2 [Oenococcus oeni]                                |
| 267      | 12    | CL_1830   | -                                                                                                  | glycosyltransferase family 2 [Oenococcus oeni]                                |
| 268      | 12    | CL_1829   | -                                                                                                  | hypothetical protein [Oenococcus oeni]                                        |
| 269      | 12    | CL_1828   | Holliday junction DNA helicase RuvA                                                                | glycosyltransferase family 1 [Oenococcus oeni]                                |
| 270      | 12    | CL_1827   | -                                                                                                  | hypothetical protein [Oenococcus oeni]                                        |
| 271      | 12    | CL_1826   | -                                                                                                  | hypothetical protein [Oenococcus oeni]                                        |
| 272      | 12    | CL_1825   | -                                                                                                  | hypothetical protein [Oenococcus oeni]                                        |
| 273      | 12    | CL_1824   | -                                                                                                  | hypothetical protein [Oenococcus oeni]                                        |
| 274      | 12    | CL_1823   | -                                                                                                  | hypothetical protein [Oenococcus oeni]                                        |
| 275      | 12    | CL_1822   | -                                                                                                  | transcriptional antiterminator [Oenococcus oeni]                              |
| 276      | 12    | CL_1821   | 6-phospho-beta-glucosidase (EC 3.2.1.86)                                                           | beta-glucosidase [Oenococcus oeni]                                            |
| 277      | 12    | CL_1820   | Transcription antiterminator, BglG family                                                          | transcriptional antiterminator [Oenococcus oeni]                              |
| 278      | 12    | CL_1819   | -                                                                                                  | PTS mannose transporter subunit IIA, partial [Oenococcus oeni]                |
| 279      | 12    | CL_1818   | PTS system, fructose-specific IIB component (EC 2.7.1.69)                                          | PTS fructose transporter subunit IIB [Oenococcus oeni]                        |
| 280      | 12    | CL_1817   | PTS system, IIC component                                                                          | hypothetical protein [Oenococcus oeni]                                        |
| 281      | 12    | CL_1816   | PTS system, IIC component                                                                          | PTS mannose transporter subunit IIA [Oenococcus oeni]                         |
| 282      | 12    | CL_1815   | Alpha-mannosidase (EC 3.2.1.24)                                                                    | hypothetical protein [Oenococcus oeni]                                        |
| 283      | 12    | CL_2042   | -                                                                                                  | hypothetical protein [Oenococcus oeni]                                        |
| 284      | 12    | CL_2041   | Oligopeptide ABC transporter, periplasmic oligopeptide-binding protein OppA (TC 3.A.1.5.1)         | peptide ABC transporter substrate-binding protein [Oenococcus oeni]           |
| 285      | 12    | CL_2040   | Deblocking aminopeptidase (EC 3.4.11.-)                                                            | peptidase M42 [Oenococcus oeni]                                               |
| 286      | 12    | CL_2039   | FIG00628259: hypothetical protein                                                                  | peptidase [Oenococcus oeni]                                                   |
| 287      | 12    | CL_2038   | Substrate-specific component YkoE of thiamin-regulated ECF transporter for HydroxyMethylPyrimidine | ABC transporter permease [Oenococcus oeni]                                    |

**B**

| Position | IGI # | Cluster # | RAST annotation                                          | BLAST top hit                                         |
|----------|-------|-----------|----------------------------------------------------------|-------------------------------------------------------|
| 609      | 28    | CL_17065  | -                                                        | hypothetical protein [Oenococcus oeni]                |
| 610      | 28    | CL_17066  | Xylose kinase (EC 2.7.1.17)                              | xylose kinase [Oenococcus oeni]                       |
| 611      | 28    | CL_17067  | Xylose isomerase (EC 5.3.1.5)                            | xylose isomerase [Lactobacillus casei]                |
| 612      | 28    | CL_19301  | Xylose repressor                                         | transcriptional regulator [Lactobacillus buchneri]    |
| 613      | 28    | CL_17068  | D-xylose proton-symporter XylT                           | hypothetical protein [Oenococcus oeni]                |
| 614      | 28    | CL_17069  | -                                                        | hypothetical protein [Oenococcus oeni]                |
| 615      | 28    | CL_17070  | PTS system, mannose-specific IIB component (EC 2.7.1.69) | PTS sorbose transporter subunit IIB [Oenococcus oeni] |
| 616      | 28    | CL_17071  | Alpha-xylosidase (EC 3.2.1.-)                            | family 3I glucosidase [Oenococcus oeni]               |
| 617      | 28    | CL_17072  | PTS system, mannose-specific IIC component               | PTS mannose transporter subunit IIC [Oenococcus oeni] |
| 618      | 28    | CL_17073  | PTS system, mannose-specific IID component               | PTS mannose transporter subunit IID [Oenococcus oeni] |
| 619      | 28    | CL_17074  | Trehalose-6-phosphate hydrolase (EC 3.2.1.93)            | oligo-1,6-glucosidase [Oenococcus oeni]               |
| 620      | 28    | CL_19206  | Ferrochelatase, protoheme ferro-lyase (EC 4.99.1.1)      | ferrochelatase [Enterococcus moraviensis]             |

**C**

| Position | IGI # | Cluster # | RAST annotation                                 | BLAST top hit                                        |
|----------|-------|-----------|-------------------------------------------------|------------------------------------------------------|
| 1525     | 92    | CL_20397  | -                                               | transcriptional regulator [Oenococcus oeni]          |
| 1526     | 92    | CL_20398  | Glutathione S-transferase (EC 2.5.1.18)         | glutathione S-transferase [Oenococcus oeni]          |
| 1527     | 92    | CL_20399  | L-ribulose-5-phosphate 4-epimerase (EC 5.1.3.4) | L-ribulose-5-phosphate 4-epimerase [Oenococcus oeni] |
| 1528     | 92    | CL_2100   | L-xylose 5-phosphate 3-epimerase (EC 5.1.3.-)   | L-xylose 5-phosphate 3-epimerase [Oenococcus oeni]   |
| 1529     | 92    | CL_2101   | L-xylosylkinase (EC 2.7.1.53)                   | carbohydrate kinase [Oenococcus oeni]                |
| 1530     | 92    | CL_2102   | -                                               | hypothetical protein [Oenococcus oeni]               |

**D**

| Position | IGI # | Cluster # | RAST annotation                                          | BLAST top hit                                                      |
|----------|-------|-----------|----------------------------------------------------------|--------------------------------------------------------------------|
| 1718     | 111   | CL_17654  | -                                                        | PTS system, glucose/sucrose specific IIA subunit [Oenococcus oeni] |
| 1719     | 111   | CL_17655  | -                                                        | sucrose-6-phosphate hydrolase, partial [Lactobacillus vini]        |
| 1720     | 111   | CL_17656  | Sucrose-6-phosphate hydrolase (EC 3.2.1.83)              | sucrose-6-phosphate hydrolase [Lactobacillus mali]                 |
| 1721     | 111   | CL_17657  | PTS system, sucrose-specific IIB component (EC 2.7.1.69) | PTS sugar transporter [Oenococcus oeni]                            |
| 1722     | 111   | CL_17658  | -                                                        | sucrose operon repressor [Lactobacillus mali]                      |
| 1723     | 111   | CL_17659  | -                                                        | sucrose operon repressor [Lactobacillus mali]                      |
